# Supplementary material for: Electroacupuncture for Opioid-Sparing Analgesia and Enhanced Recovery after Surgery: A Systematic Review and Meta-Analysis of Randomized Controlled Trials
Source: Research Square preprint supplement (doi:10.21203/rs.3.rs-8047427/v1), 2026-02-19
Supplement: Supplementary file 2 [file b0e558f0d923946dd7458674.docx]

**Supplementary materials**

**Table S1** Literature search strategy

**1.Pubmed**

| Search number | Query |
| --- | --- |
| #1 | Electroacupuncture[Title/Abstract] |
| #2 | Analgesics, Opioid[MeSH Terms] |
| #3 | (((((((((((((((((((((Analgesics, Opioid[Title/Abstract]) OR (Opioid Analgesic[Title/Abstract])) OR (Analgesic, Opioid[Title/Abstract])) OR (Opioid Analgesics[Title/Abstract])) OR (Opioids[Title/Abstract])) OR (Opioid[Title/Abstract])) OR (Full Opioid Agonists[Title/Abstract])) OR (Agonists, Full Opioid[Title/Abstract])) OR (Opioid Agonists, Full[Title/Abstract])) OR (Opioid Full Agonists[Title/Abstract])) OR (Agonists, Opioid Full[Title/Abstract])) OR (Full Agonists, Opioid[Title/Abstract])) OR (Opioid Mixed Agonist-Antagonists[Title/Abstract])) OR (Agonist-Antagonists, Opioid Mixed[Title/Abstract])) OR (Mixed Agonist-Antagonists, Opioid[Title/Abstract])) OR (Opioid Mixed Agonist Antagonists[Title/Abstract])) OR (Partial Opioid Agonists[Title/Abstract])) OR (Agonists, Partial Opioid[Title/Abstract])) OR (Opioid Agonists, Partial[Title/Abstract])) OR (Opioid Partial Agonists[Title/Abstract])) OR (Agonists, Opioid Partial[Title/Abstract])) OR (Partial Agonists, Opioid[Title/Abstract]) |
| #4 | (Analgesics, Opioid[MeSH Terms]) OR ((((((((((((((((((((((Analgesics, Opioid[Title/Abstract]) OR (Opioid Analgesic[Title/Abstract])) OR (Analgesic, Opioid[Title/Abstract])) OR (Opioid Analgesics[Title/Abstract])) OR (Opioids[Title/Abstract])) OR (Opioid[Title/Abstract])) OR (Full Opioid Agonists[Title/Abstract])) OR (Agonists, Full Opioid[Title/Abstract])) OR (Opioid Agonists, Full[Title/Abstract])) OR (Opioid Full Agonists[Title/Abstract])) OR (Agonists, Opioid Full[Title/Abstract])) OR (Full Agonists, Opioid[Title/Abstract])) OR (Opioid Mixed Agonist-Antagonists[Title/Abstract])) OR (Agonist-Antagonists, Opioid Mixed[Title/Abstract])) OR (Mixed Agonist-Antagonists, Opioid[Title/Abstract])) OR (Opioid Mixed Agonist Antagonists[Title/Abstract])) OR (Partial Opioid Agonists[Title/Abstract])) OR (Agonists, Partial Opioid[Title/Abstract])) OR (Opioid Agonists, Partial[Title/Abstract])) OR (Opioid Partial Agonists[Title/Abstract])) OR (Agonists, Opioid Partial[Title/Abstract])) OR (Partial Agonists, Opioid[Title/Abstract])) |
| #5 | postoperative[MeSH Terms] |
| #6 | ((((postoperative[Title/Abstract]) OR (Postoperative Period[Title/Abstract])) OR (Period, Postoperative[Title/Abstract])) OR (Periods, Postoperative[Title/Abstract])) OR (Postoperative Periods[Title/Abstract]) |
| #7 | (postoperative[MeSH Terms]) OR (((((postoperative[Title/Abstract]) OR (Postoperative Period[Title/Abstract])) OR (Period, Postoperative[Title/Abstract])) OR (Periods, Postoperative[Title/Abstract])) OR (Postoperative Periods[Title/Abstract])) |
| #8 | ((Electroacupuncture[Title/Abstract]) AND ((Analgesics, Opioid[MeSH Terms]) OR ((((((((((((((((((((((Analgesics, Opioid[Title/Abstract]) OR (Opioid Analgesic[Title/Abstract])) OR (Analgesic, Opioid[Title/Abstract])) OR (Opioid Analgesics[Title/Abstract])) OR (Opioids[Title/Abstract])) OR (Opioid[Title/Abstract])) OR (Full Opioid Agonists[Title/Abstract])) OR (Agonists, Full Opioid[Title/Abstract])) OR (Opioid Agonists, Full[Title/Abstract])) OR (Opioid Full Agonists[Title/Abstract])) OR (Agonists, Opioid Full[Title/Abstract])) OR (Full Agonists, Opioid[Title/Abstract])) OR (Opioid Mixed Agonist-Antagonists[Title/Abstract])) OR (Agonist-Antagonists, Opioid Mixed[Title/Abstract])) OR (Mixed Agonist-Antagonists, Opioid[Title/Abstract])) OR (Opioid Mixed Agonist Antagonists[Title/Abstract])) OR (Partial Opioid Agonists[Title/Abstract])) OR (Agonists, Partial Opioid[Title/Abstract])) OR (Opioid Agonists, Partial[Title/Abstract])) OR (Opioid Partial Agonists[Title/Abstract])) OR (Agonists, Opioid Partial[Title/Abstract])) OR (Partial Agonists, Opioid[Title/Abstract])))) AND ((postoperative[MeSH Terms]) OR (((((postoperative[Title/Abstract]) OR (Postoperative Period[Title/Abstract])) OR (Period, Postoperative[Title/Abstract])) OR (Periods, Postoperative[Title/Abstract])) OR (Postoperative Periods[Title/Abstract]))) |

**2.Cochrane**

| Search number | Query |
| --- | --- |
| #1 | MeSH descriptor: [Electroacupuncture] explode all trees |
| #2 | MeSH descriptor: [Analgesics, Opioid] explode all trees |
| #3 | (Opioid Analgesic):ti,ab,kw OR (Analgesic, Opioid):ti,ab,kw OR (Opioid Analgesics):ti,ab,kw OR (Opioids):ti,ab,kw OR (Opioid):ti,ab,kw |
| #4 | (Full Opioid Agonists):ti,ab,kw OR (Agonists, Full Opioid):ti,ab,kw OR (Opioid Agonists, Full):ti,ab,kw OR (Opioid Full Agonists):ti,ab,kw OR (Agonists, Opioid Full):ti,ab,kw |
| #5 | (Full Agonists, Opioid):ti,ab,kw OR (Opioid Mixed Agonist-Antagonists):ti,ab,kw OR (Agonist-Antagonists, Opioid Mixed):ti,ab,kw OR (Mixed Agonist-Antagonists, Opioid):ti,ab,kw OR (Opioid Mixed Agonist Antagonists):ti,ab,kw |
| #6 | (Partial Opioid Agonists):ti,ab,kw OR (Agonists, Partial Opioid):ti,ab,kw OR (Opioid Agonists, Partial):ti,ab,kw OR (Opioid Partial Agonists):ti,ab,kw OR (Agonists, Opioid Partial):ti,ab,kw |
| #7 | (Partial Agonists, Opioid):ti,ab,kw(ONO-2745):ti,ab,kw OR (ONO2745):ti,ab,kw |
| #8 | #2 or #3 or #4 or #5 or #6 or #7 |
| #9 | (postoperative):ti,ab,kw OR (Postoperative Period):ti,ab,kw OR (Period, Postoperative):ti,ab,kw OR (Periods, Postoperative):ti,ab,kw OR (Postoperative Periods):ti,ab,kw |
| #10 | #1 and #8 and #9 |

**3.Embase**

| Search number | Query |
| --- | --- |
| #1 | 'electroacupuncture'/exp |
| #2 | 'electroacupuncture':ab,ti |
| #3 | #1 OR #2 |
| #4 | 'analgesics, opioid':ab,ti |
| #5 | 'opioid analgesic':ab,ti |
| #6 | 'analgesic, opioid':ab,ti |
| #7 | 'opioid analgesics':ab,ti |
| #8 | 'opioid':ab,ti |
| #9 | 'full opioid agonists':ab,ti |
| #10 | 'agonists, full opioid':ab,ti |
| #11 | 'opioid agonists, full':ab,ti |
| #12 | 'opioid full agonists':ab,ti |
| #13 | 'agonists, opioid full':ab,ti |
| #14 | 'full agonists, opioid':ab,ti |
| #15 | 'opioid mixed agonist-antagonists':ab,ti |
| #16 | 'agonist-antagonists, opioid mixed':ab,ti |
| #17 | 'mixed agonist-antagonists, opioid':ab,ti |
| #18 | 'opioid mixed agonist antagonists':ab,ti |
| #19 | 'partial opioid agonists':ab,ti |
| #20 | 'agonists, partial opioid':ab,ti |
| #21 | 'opioid agonists, partial':ab,ti |
| #22 | 'opioid partial agonists':ab,ti |
| #23 | 'agonists, opioid partial':ab,ti |
| #24 | 'partial agonists, opioid':ab,ti |
| #25 | #4 OR #5 OR #6 OR #7 OR #8 OR #9 OR #10 OR #11 OR #12 OR #13 OR #14 OR #15 OR #16 OR #17 OR #18 OR #19 OR #20 OR #21 OR #22 OR #23 OR #24 |
| #26 | 'postoperative':ab,ti |
| #27 | 'postoperative period':ab,ti |
| #28 | 'period, postoperative':ab,ti |
| #29 | 'periods, postoperative':ab,ti |
| #30 | 'postoperative periods':ab,ti |
| #31 | #26 OR #27 OR #28 OR #29 OR #30 |
| #32 | #3 AND #25 AND #31 |

**4.Web of science**

| Search number | Query |
| --- | --- |
| #1 | TS=(Analgesics, Opioid) OR TS=(Opioid Analgesic) OR TS=(Analgesic, Opioid) OR TS=(Opioid Analgesics) OR TS=(Opioids) OR TS=(Opioid) OR TS=(Full Opioid Agonists) OR TS=(Agonists, Full Opioid) OR TS=(Opioid Agonists, Full) OR TS=(Opioid Full Agonists) OR TS=(Agonists, Opioid Full) OR TS=(Full Agonists, Opioid) OR TS=(Opioid Mixed Agonist-Antagonists) OR TS=(Agonist-Antagonists, Opioid Mixed) OR TS=(Mixed Agonist-Antagonists, Opioid) OR TS=(Opioid Mixed Agonist Antagonists) OR TS=(Partial Opioid Agonists) OR TS=(Agonists, Partial Opioid) OR TS=(Opioid Agonists, Partial) OR TS=(Opioid Partial Agonists) OR TS=(Agonists, Opioid Partial) OR TS=(Partial Agonists, Opioid) |
| #2 | TS=(Electroacupuncture) |
| #3 | TS=(postoperative) OR TS=(Postoperative Period) OR TS=(Period, Postoperative) OR TS=(Periods, Postoperative) OR TS=(Postoperative Periods) |
| #4 | #1 AND #2 AND #3 |


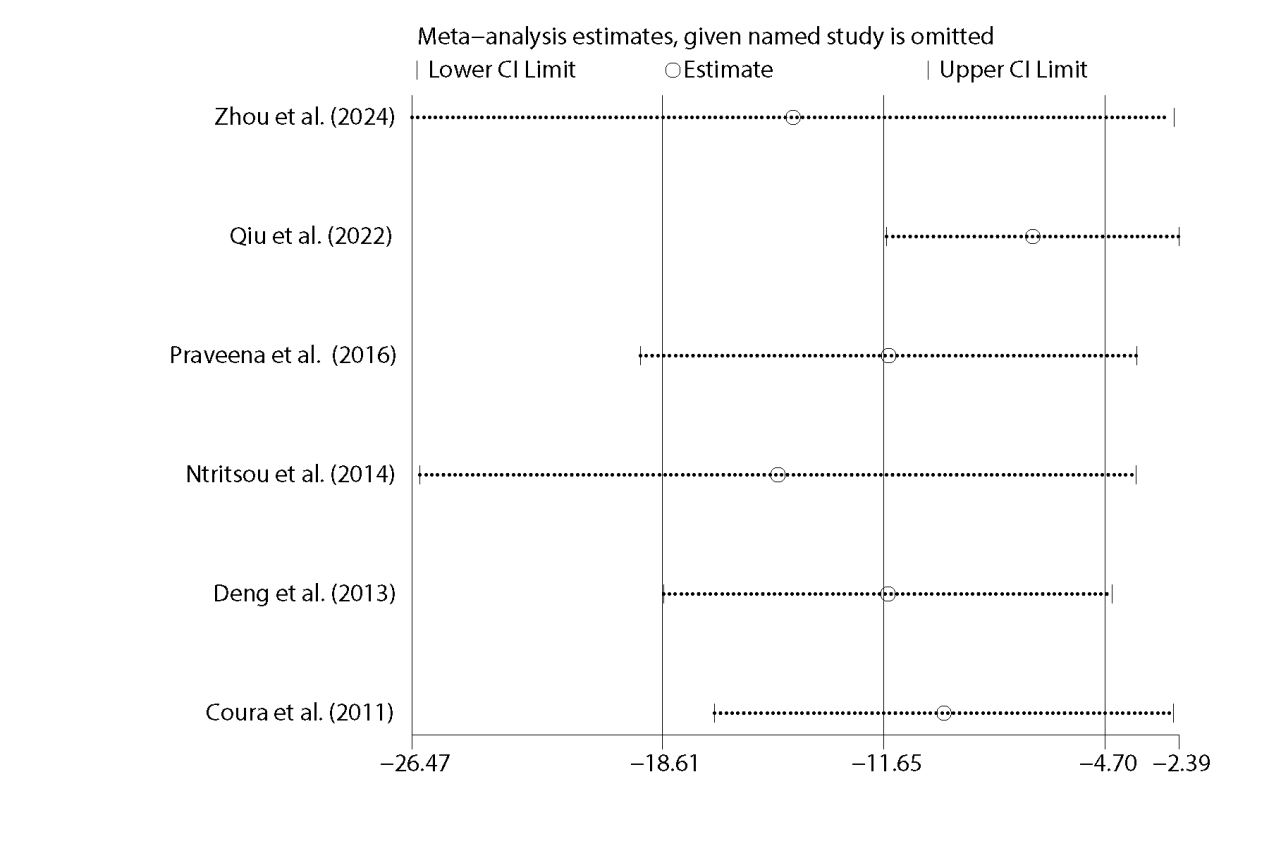


Figure S1 sensitivity analyses - Total Postoperative Opioid Consumption (MME)


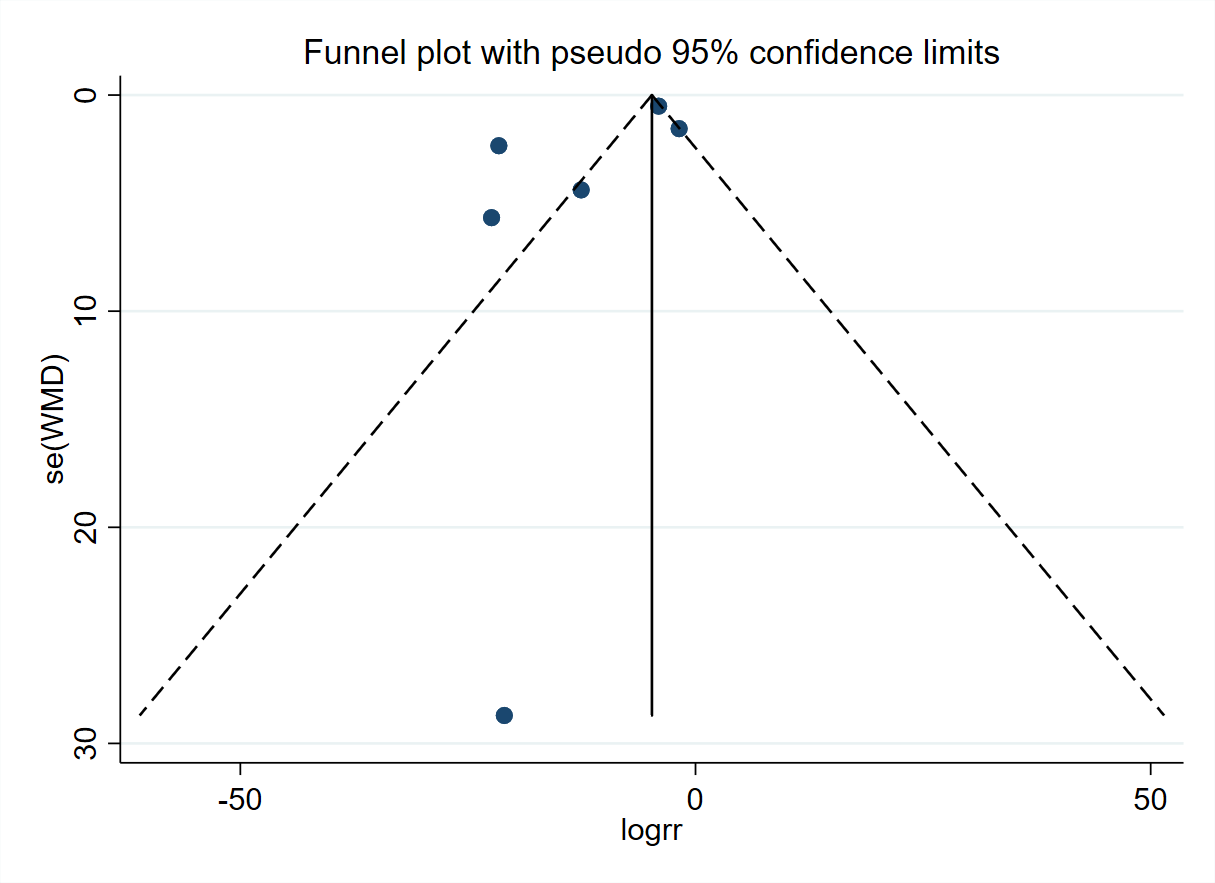


Figure S2 funnel plots - Total Postoperative Opioid Consumption (MME)


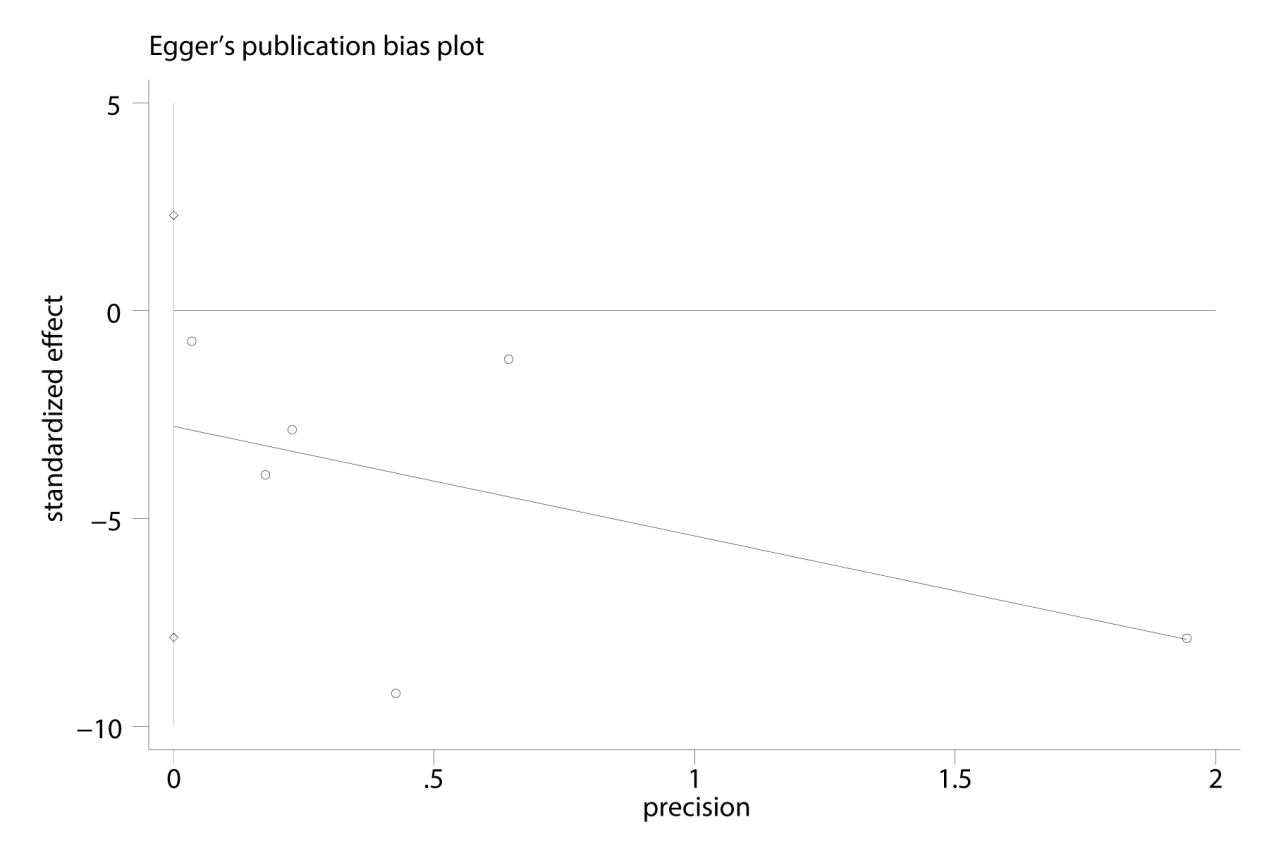


Figure S3 Eggers test - Total Postoperative Opioid Consumption (MME)


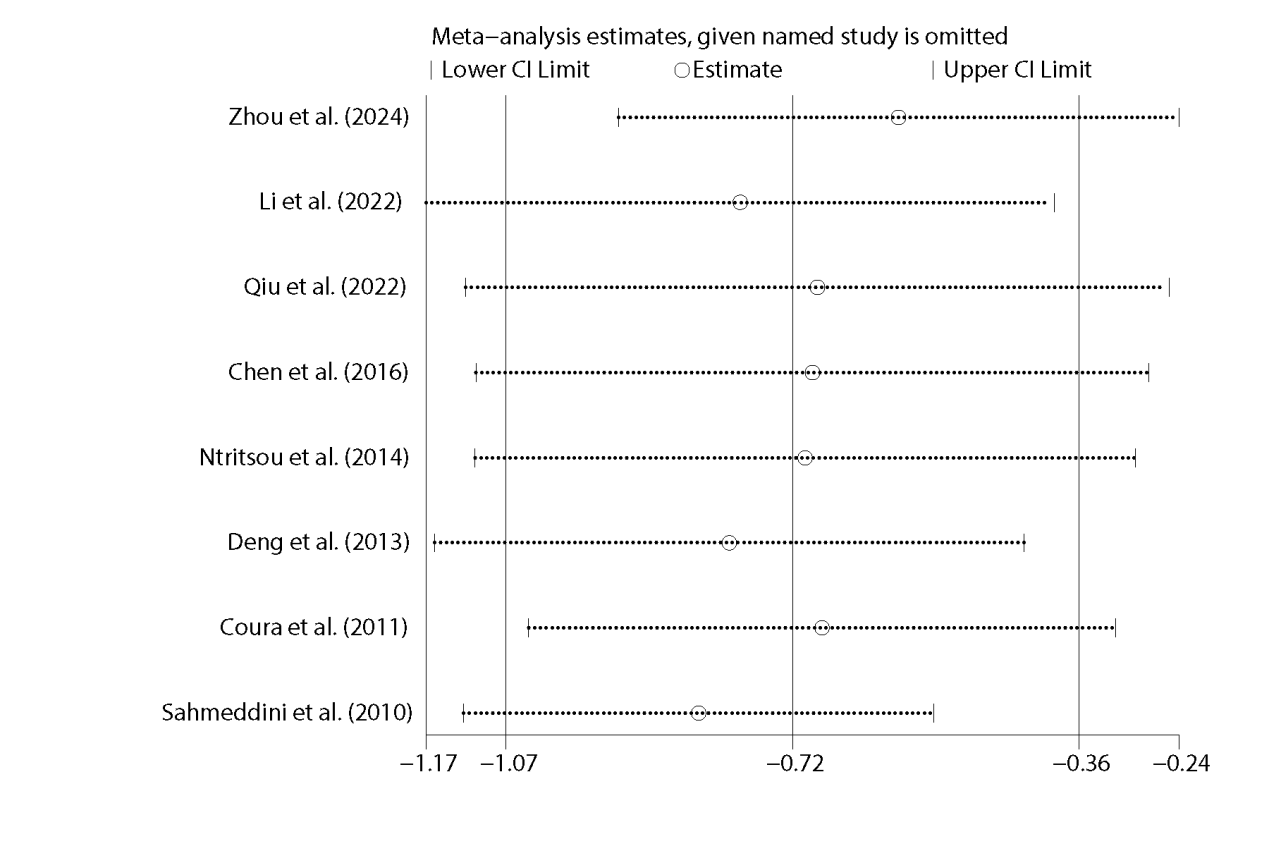


Figure S4 sensitivity analyses -Postoperative Pain Score (VAS)


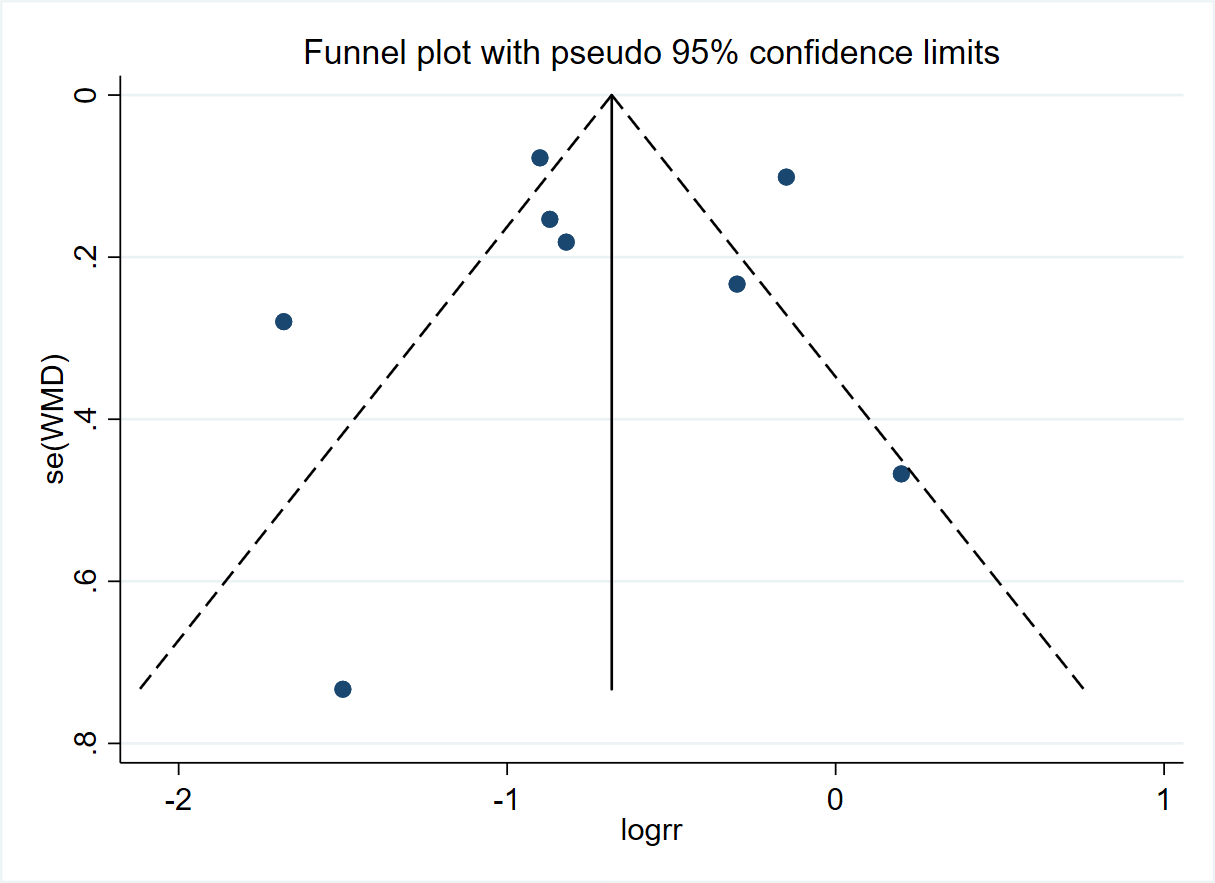


Figure S5 funnel plots - Postoperative Pain Score (VAS)


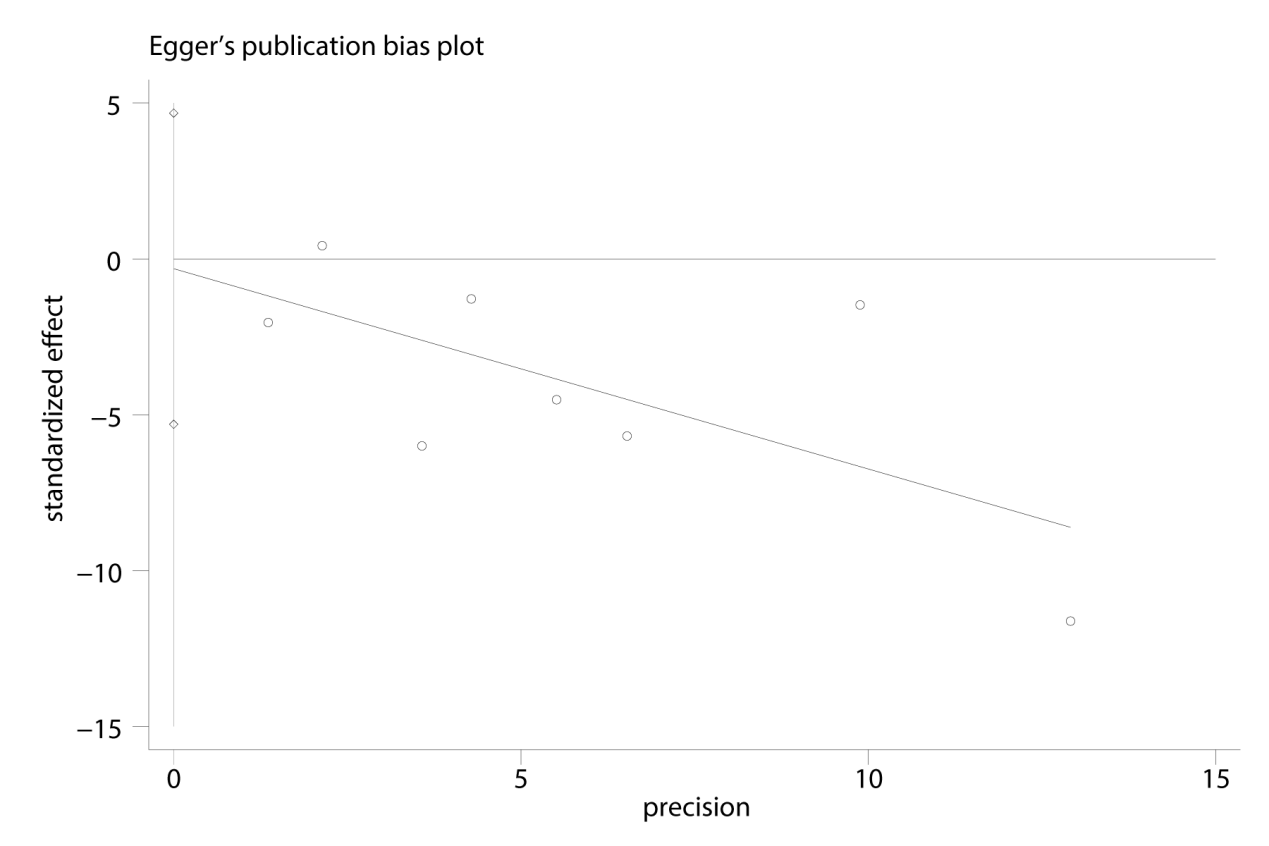


Figure S6 Eggers test - Postoperative Pain Score (VAS)


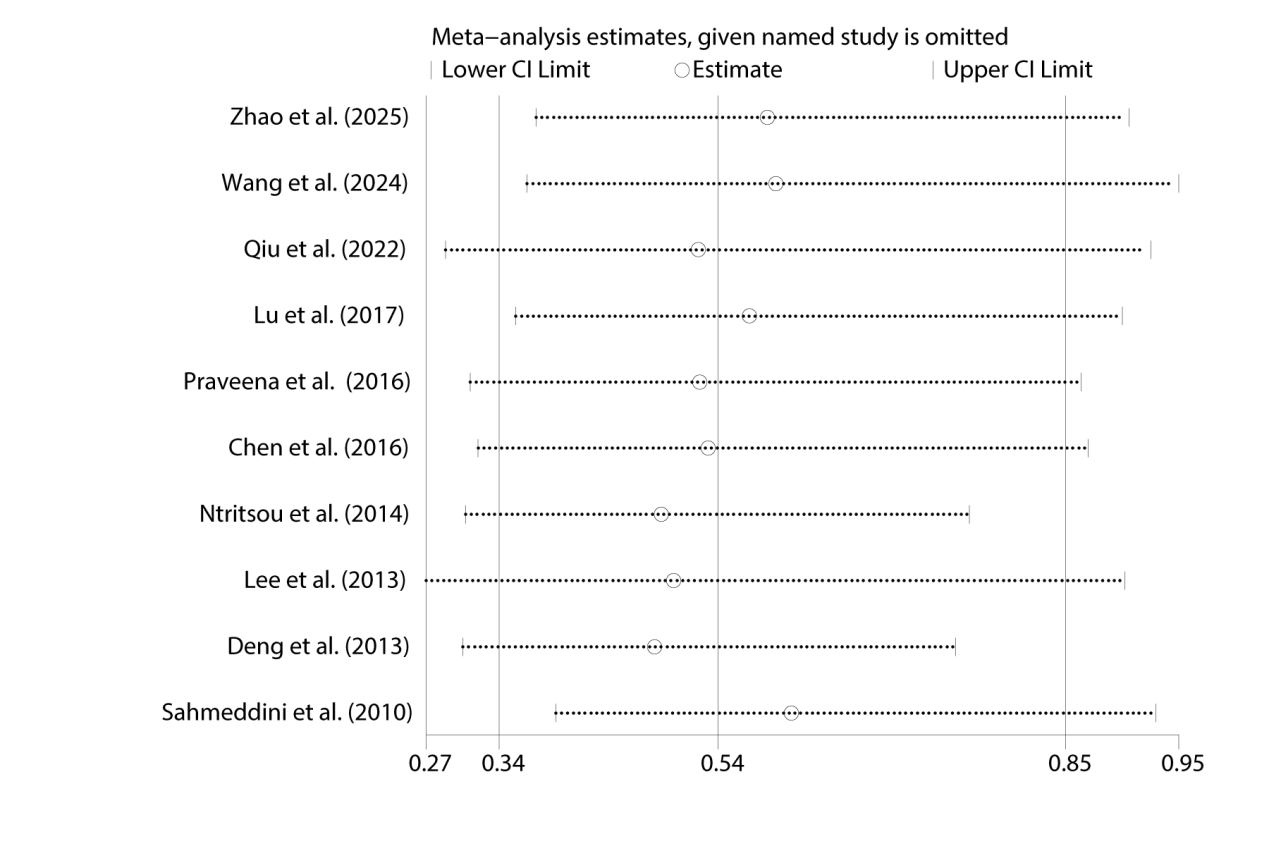


Figure S7 sensitivity analyses - Postoperative Nausea and Vomiting (PONV)


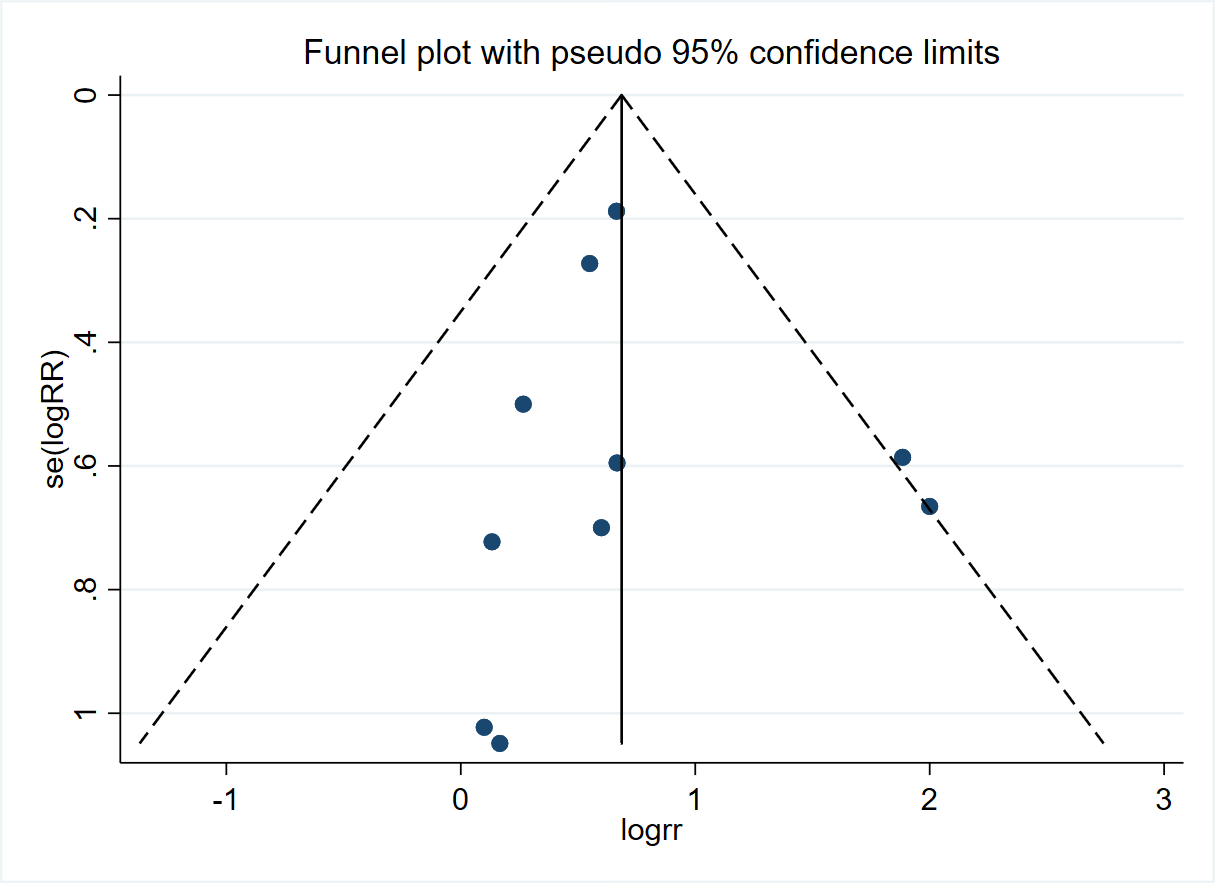


Figure S8 funnel plots - Postoperative Nausea and Vomiting (PONV)


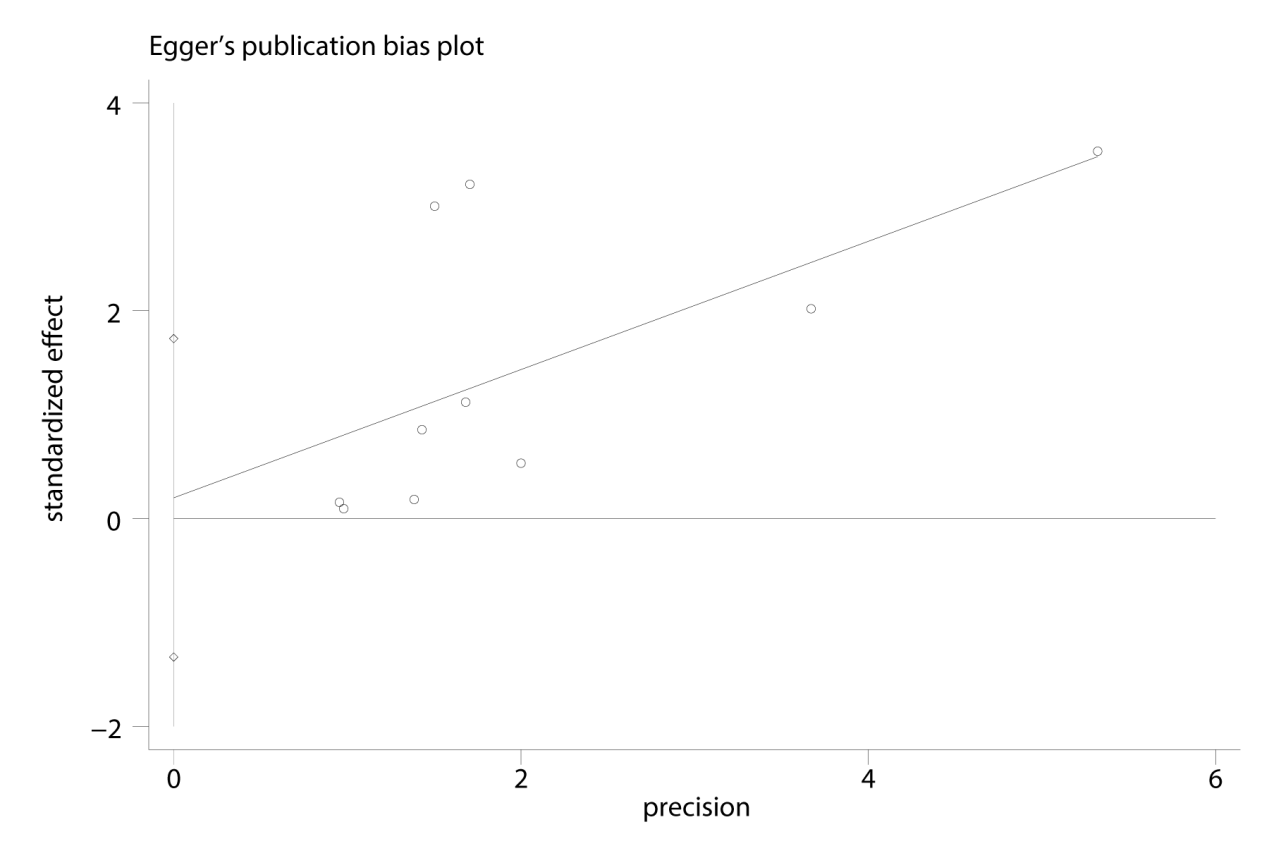


Figure S9 Eggers test – Postoperative Nausea and Vomiting (PONV)


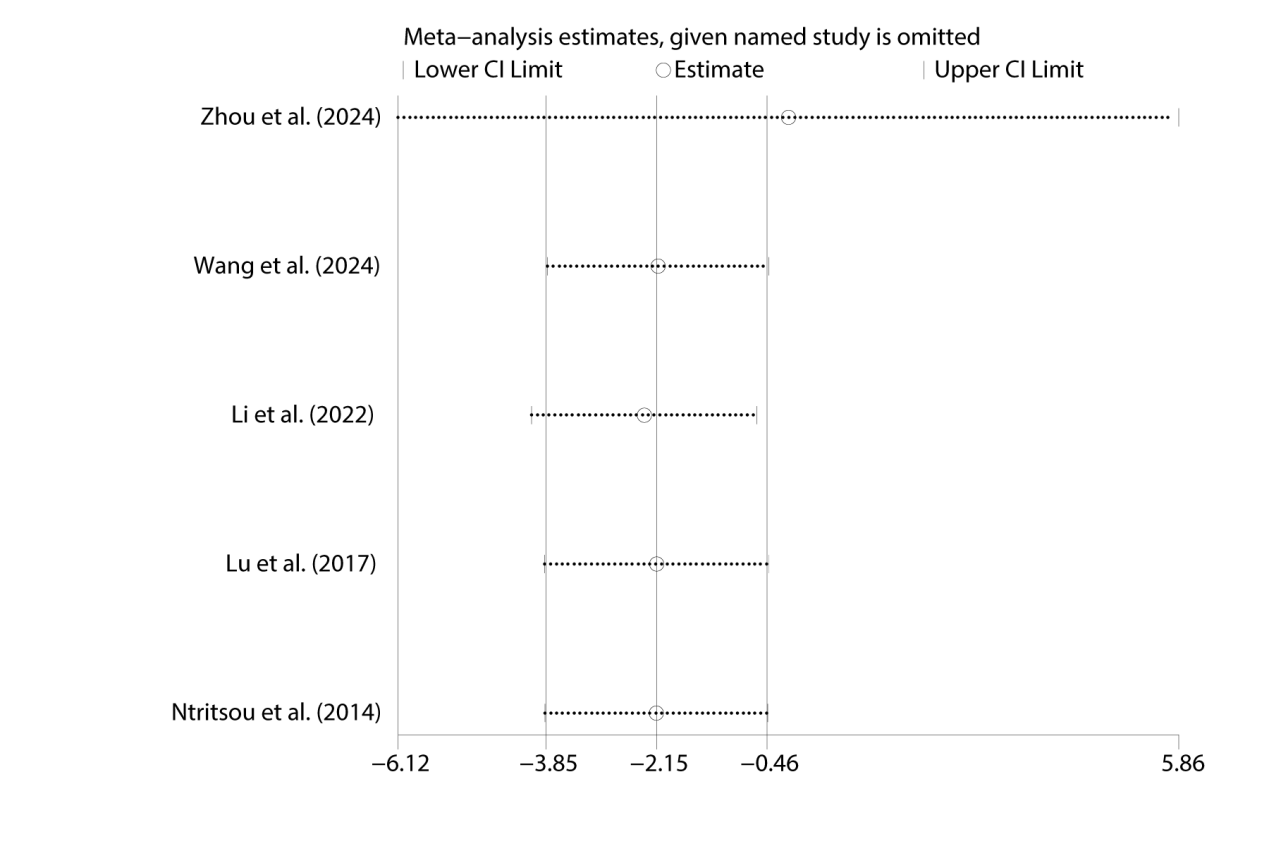


Figure S10 sensitivity analyses -Intraoperative Opioid Consumption (MME)


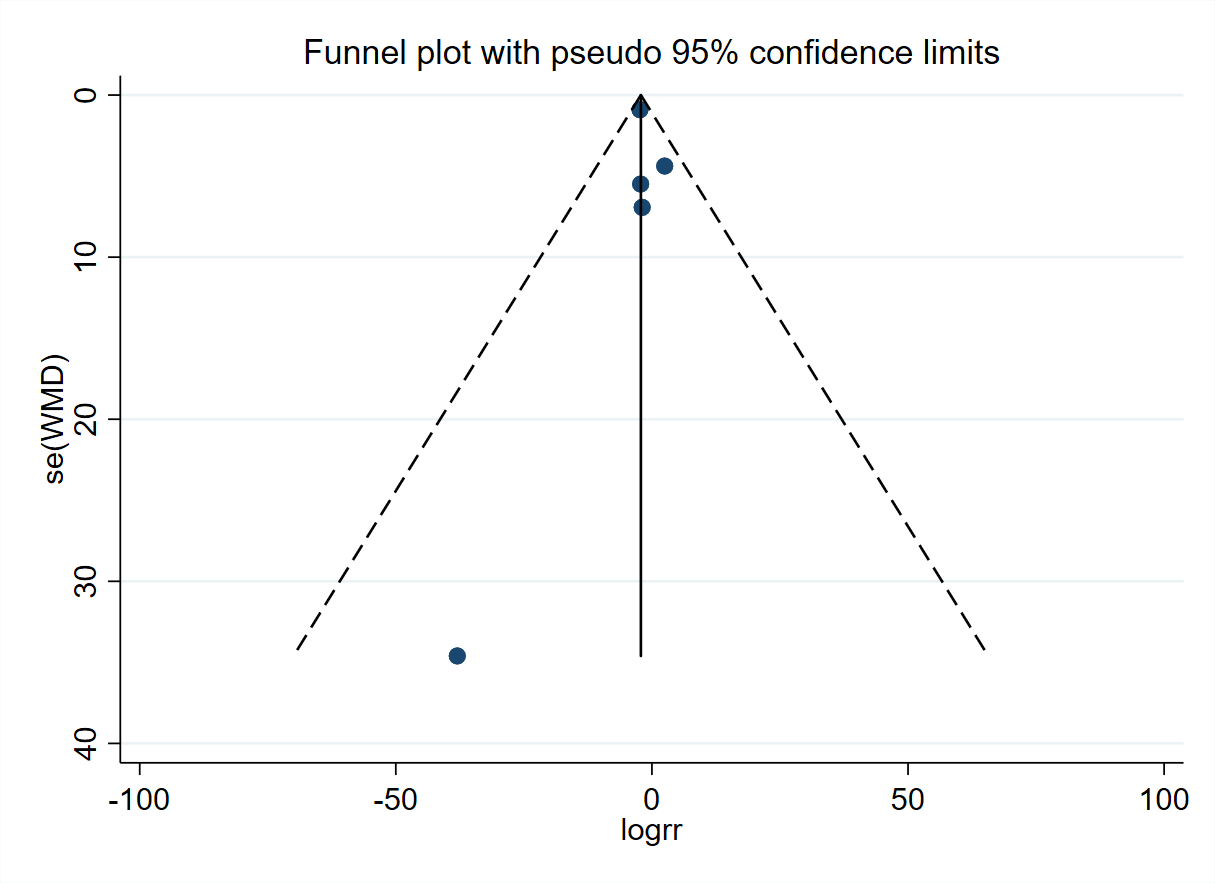


Figure S11 funnel plots - Intraoperative Opioid Consumption (MME)


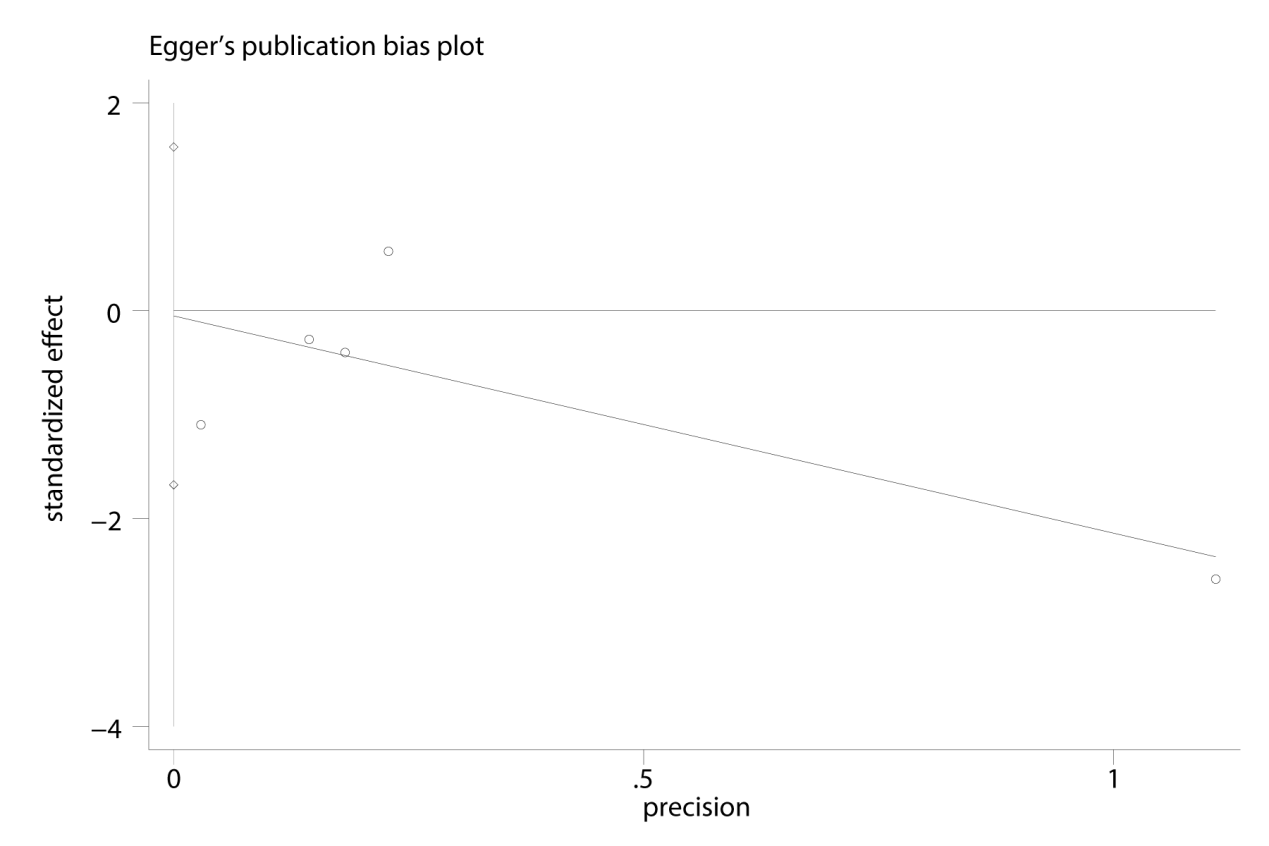


Figure S12 Eggers test – Intraoperative Opioid Consumption (MME)


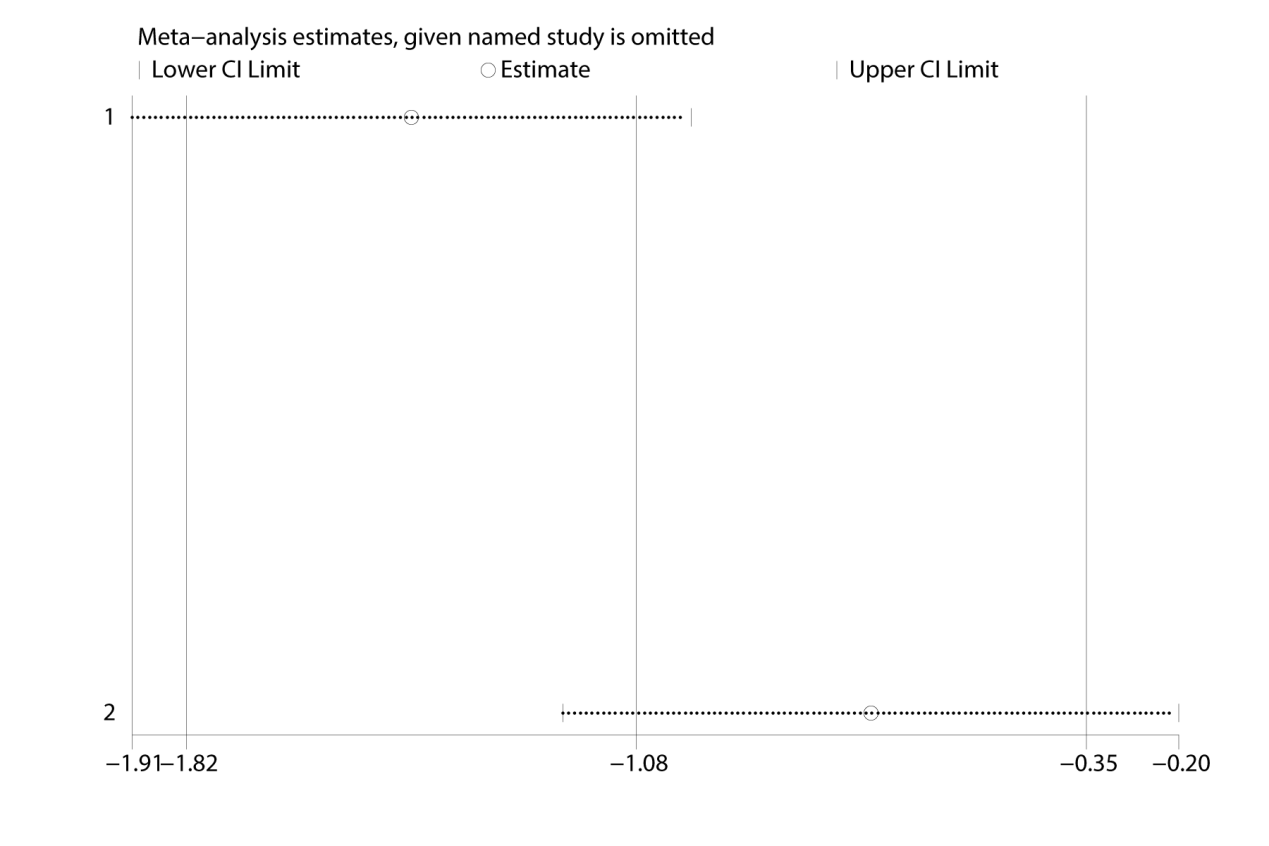


Figure S13 sensitivity analyses -Postoperative serum TNF-αconcentration (24 h)
